# Supplementary material
Source: publisher figshare collection journal article supplement (https://tandf.figshare.com/articles/dataset/_/11814822)
Supplement: Supplementary file 7 [file 1]

# Del Posto

This brand new Italian restaurant is certainly not the average pizza & pasta place! The mouth-watering menu, brought to you on a tablet, shows traditional Italian dishes, such as antipasti, parmigiana, pasta and pizza from a wood-burned oven. On the tablet you receive information about the ingredients of the dishes and about the choice and the origin of wines. Del Posto will give you a full Italiana experience!

Food Quality: ★ ★ ★ ★ ☆ 4 stars

Service Quality: ★ ★ ☆ ☆ ☆ 2 stars

Average Cost 45 euro/person

Favorite Cuisine: ★ ★ ★ ☆ ☆ 3 stars

Decor: ★ ★ ★ ★ ★ 5 stars
