# Supplementary material
Source: publisher figshare collection journal article supplement (https://tandf.figshare.com/articles/dataset/_/11814822)
Supplement: Supplementary file 8 [file 1]

Archive with 13 entries (13 files):
- figure_affiliation_dominance.pdf
- figure_benefits_dominance.pdf
- figure_competence_dominance.pdf
- figure_description.pdf
- figure_person_dominance2.pdf
- figure_person_persuasion_new.pdf
- figure_persuasion_new.pdf
- figure_regression_affiliation.pdf
- figure_satisfaction_dominance.pdf
- figure_study_overview.pdf
- figure_system_dominance2.pdf
- interactcadsample 2019 september.tex
- references.bib
