# Supplementary material
Source: publisher figshare collection journal article supplement (https://tandf.figshare.com/articles/dataset/_/11814822)
Supplement: Supplementary file 8 [file 1 › references.bib]

@article{anderson2009dominant,
  title={Why do dominant personalities attain influence in face-to-face groups? The competence-signaling effects of trait dominance},
  author={Anderson, Cameron and Kilduff, Gavin J},
  journal={Journal of personality and social psychology},
  volume={96},
  number={2},
  pages={491--503},
  year={2009},
  publisher={American Psychological Association},
  url={http://dx.doi.org/10.1037/a0014201}
}
@inproceedings{andrews2009measure,
  title={Measure of belief change as an evaluation of persuasion},
  author={Andrews, Pierre and Manandhar, Suresh},
  booktitle={Proceedings of the Persuasive Technology and Digital Behaviour Intervention Symposium},
  pages={4--9},
  year={2009},
  organization={The Society for the Study of Artificial Intelligence and the Simulation of Behaviour, London, UK}
}
@article{bahns2017similarity,
  title={Similarity in relationships as niche construction: Choice, stability, and influence within dyads in a free choice environment.},
  author={Bahns, Angela J and Crandall, Christian S and Gillath, Omri and Preacher, Kristopher J},
  journal={Journal of Personality and Social Psychology},
  volume={112},
  number={2},
  pages={329},
  year={2017},
  publisher={American Psychological Association}
}
@article{batalha2011all,
  title={All else being equal: Are men always higher in social dominance orientation than women?},
  author={Batalha, Luisa and Reynolds, Katherine J and Newbigin, Carolyn A},
  journal={European Journal of Social Psychology},
  volume={41},
  number={6},
  pages={796--806},
  year={2011},
  publisher={Wiley Online Library}
}
@article{berkovsky2012influencing,
  title={Influencing individually: fusing personalization and persuasion},
  author={Berkovsky, Shlomo and Freyne, Jill and Oinas-Kukkonen, Harri},
  journal={ACM Transactions on Interactive Intelligent Systems (TiiS)},
  volume={2},
  number={2},
  pages={4153--4157},
  year={2012},
  publisher={ACM},
  url={http://dx.doi.org/10.1145/2209310}
}
@article{berkowitz1957personality,
  title={Personality characteristics related to susceptibility to influence by peers or authority figures},
  author={Berkowitz, Leonard and Lundy, Richard M},
  journal={Journal of Personality},
  volume={25},
  number={3},
  pages={306--316},
  year={1957},
  publisher={Wiley Online Library},
  url={https://doi.org/10.1111/j.1467-6494.1957.tb01529.x}
}
@article{blazer1963complementary,
  title={Complementary needs and marital happiness},
  author={Blazer, John A},
  journal={Marriage and Family Living},
  volume={25},
  number={1},
  pages={89--95},
  year={1963},
  publisher={JSTOR},
  url={https://www.jstor.org/stable/349014}
}
@article{burgoon1984fundamental,
  title={The fundamental topoi of relational communication},
  author={Burgoon, Judee K and Hale, Jerold L},
  journal={Communication Monographs},
  volume={51},
  number={3},
  pages={193--214},
  year={1984},
  publisher={Taylor \& Francis},
  url={https://doi.org/10.1080/03637758409390195}
}
@article{burgoon1998nature,
  title={The nature and measurement of interpersonal dominance},
  author={Burgoon, Judee K and Johnson, Michelle L and Koch, Pamela T},
  journal={Communications Monographs},
  volume={65},
  number={4},
  pages={308--335},
  year={1998},
  publisher={Taylor \& Francis Group},
  url={https://doi.org/10.1080/03637759809376456}
}
@inproceedings{busch2016more,
  title={More than sex: The role of femininity and masculinity in the design of personalized persuasive games},
  author={Busch, Marc and Mattheiss, Elke and Reisinger, Michaela and Orji, Rita and Fr{\"o}hlich, Peter and Tscheligi, Manfred},
  booktitle={International Conference on Persuasive Technology},
  pages={219--229},
  year={2016},
  organization={Springer}
}
@article{byrne1969attitudes,
  title={Attitudes and attraction},
  author={Byrne, Donn},
  journal={Advances in experimental social psychology},
  volume={4},
  pages={35--89},
  year={1969},
  publisher={Elsevier},
  url={https://doi.org/10.1016/S0065-2601(08)60076-3}
}
@incollection{carli2013gendered,
  title={Gendered communication and social influence},
  author={Carli, Linda L},
  editor={Ryan, Michelle K and Branscombe, Nyla R},
  booktitle={The SAGE Handbook of Gender and Psychology},
  pages={199--215},
  year={2013},
  publisher={SAGE}
}
@article{chaiken1980heuristic,
  title={Heuristic versus systematic information processing and the use of source versus message cues in persuasion},
  author={Chaiken, Shelly},
  journal={Journal of personality and social psychology},
  volume={39},
  number={5},
  pages={752--766},
  year={1980},
  publisher={American Psychological Association},
  url={http://dx.doi.org/10.1037/0022-3514.39.5.752}
}
@article{cialdini1998social,
  title={Social influence: Social norms, conformity and compliance},
  author={Cialdini, Robert B and Trost, Melanie R},
  year={1998},
  publisher={McGraw-Hill}
}
@book{cialdini2009influence,
  title={Influence: Science and practice},
  author={Cialdini, Robert B},
  volume={3},
  year={1993},
  publisher={HarperCollins College Publishers, New York, NY, US}
}
@article{digman1990personality,
  title={Personality structure: Emergence of the five-factor model},
  author={Digman, John M},
  journal={Annual review of psychology},
  volume={41},
  number={1},
  pages={417--440},
  year={1990},
  url={http://dx.doi.org/10.1146/annurev.ps.41.020190.002221}
}
@article{dovidio1988power,
  title={Power displays between women and men in discussions of gender-linked tasks: A multichannel study},
  author={Dovidio, John F and Brown, Clifford E and Heltman, Karen and Ellyson, Steve L and Keating, Caroline F},
  journal={Journal of personality and Social Psychology},
  volume={55},
  number={4},
  pages={580--587},
  year={1988},
  publisher={American Psychological Association}
}
@article{duck1978personality,
  title={Personality similarity and the development of friendship: A longitudinal study},
  author={Duck, Steven W and Craig, Gordon},
  journal={British Journal of Social and Clinical Psychology},
  volume={17},
  number={3},
  pages={237--242},
  year={1978},
  publisher={Wiley Online Library},
  url={https://doi.org/10.1111/j.2044-8260.1978.tb00272.x}
}
@article{eagly1978sex,
  title={Sex differences in influenceability},
  author={Eagly, Alice H},
  journal={Psychological Bulletin},
  volume={85},
  number={1},
  pages={86--116},
  year={1978},
  publisher={American Psychological Association},
  url={http://dx.doi.org/10.1037/0033-2909.85.1.86}
}
@article{eagly1981sex,
  title={Sex of researchers and sex-typed communications as determinants of sex differences in influenceability: A meta-analysis of social influence studies},
  author={Eagly, Alice H and Carli, Linda L},
  journal={Psychological Bulletin},
  volume={90},
  number={1},
  pages={1--20},
  year={1981},
  publisher={American Psychological Association},
  url={http://dx.doi.org/10.1037/0033-2909.90.1.1}
}
@misc{fishman1978interaction,
  title={Interaction: The Work Women Do. Sociolinguistics: A Reader and Cousebook},
  author={Fishman, P},
  year={1978},
  publisher={St Martin Press, Inc., New York, NY}
}
@article{fogg1998charismatic,
  title={Charismatic computers: Creating more likable and persuasive interactive technologies by leveraging principles from social psychology},
  author={Fogg, Brian J},
  year={1998},
  publisher={Stanford University}
}
@book{fogg2003,
  title={Persuasive Technology: Using Computers to Change what We Think and Do},
  author={Fogg, Brian J},
  year={2003},
  publisher={Morgan Kaufmann}
}
@book{friedman1999personality,
  title={Personality: Classic theories and modern research},
  author={Friedman, Howard S and Schustack, Miriam W},
  year={1999},
  publisher={Allyn and Bacon Boston, MA}
}
@article{gamer2005whats,
  title={What's in a name? Persuasion perhaps},
  author={Gamer, Randy},
  journal={Journal of Consumer Psychology},
  volume={15},
  number={2},
  pages={108--116},
  year={2005},
  publisher={Wiley Online Library},
  url={https://doi.org/10.1207/s15327663jcp1502_3}
}
@article{goldberg1990alternative,
  title={An alternative" description of personality": the big-five factor structure},
  author={Goldberg, Lewis R},
  journal={Journal of personality and social psychology},
  volume={59},
  number={6},
  pages={1216--1229},
  year={1990},
  publisher={American Psychological Association}
}
@article{goldberg1993structure,
  title={The structure of phenotypic personality traits},
  author={Goldberg, Lewis R},
  journal={American psychologist},
  volume={48},
  number={1},
  pages={26--34},
  year={1993},
  publisher={American Psychological Association}
}
@inproceedings{halko2010personality,
  title={Personality and persuasive technology: An exploratory study on health-promoting mobile applications},
  author={Halko, Sajanee and Kientz, Julie A},
  booktitle={International Conference on Persuasive Technology},
  pages={150--161},
  year={2010},
  organization={Springer, Berlin, Heidelberg},
  url={https://doi.org/10.1007/978-3-642-13226-1_16}
}
@article{harre1985persuasion,
  title={Persuasion and manipulation},
  author={Harr{\'e}, Rom},
  journal={Discourse and communication},
  pages={126--142},
  year={1985},
  publisher={de Gruyter Berlin}
}
@article{haugtvedt1992personality,
  title={Personality and persuasion: Need for cognition moderates the persistence and resistance of attitude changes},
  author={Haugtvedt, Curtis P and Petty, Richard E},
  journal={Journal of Personality and Social psychology},
  volume={63},
  number={2},
  pages={308--319},
  year={1992},
  publisher={American Psychological Association},
  url={http://dx.doi.org/10.1037/0022-3514.63.2.308}
}
@article{hirsh2012personalized,
  title={Personalized persuasion tailoring persuasive appeals to recipients’ personality traits},
  author={Hirsh, Jacob B and Kang, Sonia K and Bodenhausen, Galen V},
  journal={Psychological science},
  volume={23},
  number={6},
  pages={578--581},
  year={2012},
  publisher={Sage Publications},
  url={https://doi.org/10.1177/0956797611436349}
}
@incollection{ijsselsteijn2006,
  title={Persuasive technology for human well-being: Setting the scene},
  author={IJsselsteijn, Wijnand and de Kort, Yvonne A W and Midden, Cees J H and Eggen, Berry and van den Hoven, Elise},
  booktitle={Persuasive Technology},
  pages={1--5},
  year={2006},
  publisher={Springer, Berlin, Heidelberg},
  url={https://doi.org/10.1007/11755494_1}
}
@article{izard1960personality,
  title={Personality similarity and friendship},
  author={Izard, C},
  journal={The Journal of Abnormal and Social Psychology},
  volume={61},
  number={1},
  pages={47--51},
  year={1960},
  publisher={American Psychological Association},
  url={http://dx.doi.org/10.1037/h0040056}
}
@article{janis1955anxiety,
  title={Anxiety indices related to susceptibility to persuasion},
  author={Janis, Irving L},
  journal={The Journal of Abnormal and Social Psychology},
  volume={51},
  number={3},
  pages={663--667},
  year={1955},
  publisher={American Psychological Association}
}
@misc{john1991big,
  title={The big five inventory—versions 4a and 54},
  author={John, Oliver P and Donahue, Eileen M and Kentle, Robert L},
  year={1991},
  publisher={Berkeley, CA: University of California, Berkeley, Institute of Personality and Social Research}
}
@inproceedings{kaptein2009can,
  title={Can you be persuaded? individual differences in susceptibility to persuasion},
  author={Kaptein, Maurits and Markopoulos, Panos and de Ruyter, Boris and Aarts, Emile},
  booktitle={IFIP Conference on Human-Computer Interaction},
  pages={115--118},
  year={2009},
  organization={Springer, Berlin, Heidelberg},
  url={https://doi.org/10.1007/978-3-642-03655-2_13}
}
@inproceedings{kaptein2010individual,
  title={Individual differences in persuadability in the health promotion domain},
  author={Kaptein, Maurits and Lacroix, Joyca and Saini, Privender},
  booktitle={International Conference on Persuasive Technology},
  pages={94--105},
  year={2010},
  organization={Springer, Berlin, Heidelberg},
  url={https://doi.org/10.1007/978-3-642-13226-1_11}
}
@article{kaptein2013adaptive,
  title={Adaptive persuasive messaging to increase service retention: using persuasion profiles to increase the effectiveness of email reminders},
  author={Kaptein, Maurits and Halteren, Aart},
  journal={Personal and Ubiquitous Computing},
  volume={17},
  number={6},
  pages={1173--1185},
  year={2013},
  publisher={Springer London},
  url={https://doi.org/10.1007/s00779-012-0585-3}
}
@article{kaptein2015personalizing,
  title={Personalizing persuasive technologies: Explicit and implicit personalization using persuasion profiles},
  author={Kaptein, Maurits and Markopoulos, Panos and De Ruyter, Boris and Aarts, Emile},
  journal={International Journal of Human-Computer Studies},
  volume={77},
  pages={38--51},
  year={2015},
  publisher={Elsevier},
  url={https://doi.org/10.1016/j.ijhcs.2015.01.004}
}
@article{kaufman1994men,
  title={Men, feminism, and men’s contradictory experiences of power},
  author={Kaufman, Michael},
  journal={Theorizing masculinities},
  volume={5},
  pages={142--163},
  year={1994},
  publisher={Sage}
}
@article{kelly1955consistency,
  title={Consistency of the adult personality},
  author={Kelly, E Lowell},
  journal={American Psychologist},
  volume={10},
  number={11},
  pages={659--681},
  year={1955},
  publisher={American Psychological Association},
  url={http://dx.doi.org/10.1037/h0040747}
}
@article{kiesler1983the,
  title={The 1982 Interpersonal Circle: A taxonomy for complementarity in human transactions},
  author={Kiesler, Donald J},
  journal={Psychological review},
  volume={90},
  number={3},
  pages={185--214},
  year={1983},
  publisher={American Psychological Association},
  url={http://dx.doi.org/10.1037/0033-295X.90.3.185}
}
@article{locke2000circumplex,
  title={Circumplex scales of interpersonal values: Reliability, validity, and applicability to interpersonal problems and personality disorders},
  author={Locke, Kenneth D},
  journal={Journal of personality assessment},
  volume={75},
  number={2},
  pages={249--267},
  year={2000},
  publisher={Taylor \& Francis},
  url={https://doi.org/10.1207/S15327752JPA7502_6}
}
@article{milgram1963behavioral,
  title={Behavioral study of obedience},
  author={Milgram, Stanley},
  journal={The Journal of abnormal and social psychology},
  volume={67},
  number={4},
  pages={371--378},
  year={1963},
  publisher={American Psychological Association},
  url={http://dx.doi.org/10.1037/h0040525}
}
@article{murstein1961complementary,
  title={The complementary need hypothesis in newlyweds and middle-aged married couples},
  author={Murstein, Bernard I},
  journal={The Journal of Abnormal and Social Psychology},
  volume={63},
  number={1},
  pages={194--197},
  year={1961},
  publisher={American Psychological Association},
  url={http://dx.doi.org/10.1037/h0041046}
}
@inproceedings{nass1994computers,
  title={Computers are social actors},
  author={Nass, Clifford and Steuer, Jonathan and Tauber, Ellen R},
  booktitle={Proceedings of the SIGCHI conference on Human factors in computing systems},
  pages={72--78},
  year={1994},
  organization={ACM},
  url={https://doi.org/10.1145/191666.191703}
}
@inproceedings{nass1995can,
  title={Can computer personalities be human personalities?},
  author={Nass, Clifford and Moon, Youngme and Fogg, BJ and Reeves, Byron and Dryer, Chris},
  booktitle={Conference companion on Human factors in computing systems},
  pages={228--229},
  year={1995},
  organization={ACM},
  url={https://doi.org/10.1145/223355.223538}
}
@article{nass2000machines,
  title={Machines and mindlessness: Social responses to computers},
  author={Nass, Clifford and Moon, Youngme},
  journal={Journal of social issues},
  volume={56},
  number={1},
  pages={81--103},
  year={2000},
  publisher={Wiley Online Library},
  url={https://doi.org/10.1111/0022-4537.00153}
}
@article{newcomb1956prediction,
  title={The prediction of interpersonal attraction},
  author={Newcomb, Theodore M},
  journal={American psychologist},
  volume={11},
  number={11},
  pages={575--586},
  year={1956},
  publisher={American Psychological Association},
  url={http://dx.doi.org/10.1037/h0046141}
}
@book{norton1983communicator,
  title={Communicator style: Theory, applications, and measures},
  author={Norton, Robert},
  journal={Language in Society},
  volume={14},
  number={2},
  pages={249--252},
  year={1985},
  publisher={SAGE Publications, Incorporated},
  url={https://doi.org/10.1017/S0047404500011180}
}
@inproceedings{oinas2008systematic,
  title={A systematic framework for designing and evaluating persuasive systems},
  author={Oinas-Kukkonen, Harri and Harjumaa, Marja},
  booktitle={International Conference on Persuasive Technology},
  pages={164--176},
  year={2008},
  organization={Springer, Berlin, Heidelberg},
  url={https://doi.org/10.1007/978-3-540-68504-3_15}
}
@incollection{oinas2018persuasive,
  title={Persuasive systems design: key issues, process model and system features},
  author={Oinas-Kukkonen, Harri and Harjumaa, Marja},
  journal={Communications of the Association for Information Systems},
  volume={24},
  number={1},
  pages={485--500},
  year={2009}
}
@inproceedings{orji2013modeling,
  title={Modeling gender differences in healthy eating determinants for persuasive intervention design},
  author={Orji, Rita O and Vassileva, Julita and Mandryk, Regan L},
  booktitle={International Conference on Persuasive Technology},
  pages={161--173},
  year={2013},
  organization={Springer, Berlin, Heidelberg},
  url={https://doi.org/10.1007/978-3-642-37157-8_20}
}
@article{orji2014modeling,
  title={Modeling the efficacy of persuasive strategies for different gamer types in serious games for health},
  author={Orji, Rita and Vassileva, Julita and Mandryk, Regan L},
  journal={User Modeling and User-Adapted Interaction},
  volume={24},
  number={5},
  pages={453--498},
  year={2014},
  publisher={Springer, Netherlands},
  url={https://doi.org/10.1007/s11257-014-9149-8}
}
@inproceedings{orji2015gender,
  title={Gender, age, and responsiveness to Cialdini’s persuasion strategies},
  author={Orji, Rita and Mandryk, Regan L and Vassileva, Julita},
  booktitle={International Conference on Persuasive Technology},
  pages={147--159},
  year={2015},
  organization={Springer, Cham},
  url={https://doi.org/10.1007/978-3-319-20306-5_14}
}
@article{petty1986,
  title={Communication and persuasion: Central and peripheral routes to attitude change},
  author={Petty, Richard E and Cacioppo, John T},
  year={1986},
  publisher={Springer-Verlag New York}
}
@inproceedings{reitberger2010,
  title={Measuring (Ambient) Persuasive Technologies},
  author={Reitberger, Wolfgang and Meschtscherjakov, Alexander and Tscheligi, Manfred and de Ruyter, Boris and Ham, Jaap},
  booktitle={Proceedings of Measuring Behavior},
  pages={489--490},  
  year={2010},
  organization={Noldus}
}
@article{roskos1992accessibility,
  title={The accessibility of source likability as a determinant of persuasion},
  author={Roskos-Ewoldsen, David R and Fazio, Russell H},
  journal={Personality and Social Psychology Bulletin},
  volume={18},
  number={1},
  pages={19--25},
  year={1992},
  publisher={Sage Publications},
  url={https://doi.org/10.1177/0146167292181004}
}
@inproceedings{sakai2011personalized,
  title={Personalized persuasion in ambient intelligence: The apstairs system},
  author={Sakai, Ryo and Van Peteghem, Sarah and van de Sande, Leoni and Banach, Peter and Kaptein, Maurits},
  booktitle={International Joint Conference on Ambient Intelligence},
  pages={205--209},
  year={2011},
  organization={Springer, Berlin, Heidelberg},
  url={https://doi.org/10.1007/978-3-642-25167-2_26}
}
@article{schmitt2017personality,
  title={Personality and gender differences in global perspective},
  author={Schmitt, David P and Long, Audrey E and McPhearson, Allante and O'brien, Kirby and Remmert, Brooke and Shah, Seema H},
  journal={International Journal of Psychology},
  volume={52},
  pages={45--56},
  year={2017},
  publisher={Wiley Online Library}
}
@article{steinmetz2016effective,
  title={How effective are behavior change interventions based on the theory of planned behavior?},
  author={Steinmetz, Holger and Knappstein, Michael and Ajzen, Icek and Schmidt, Peter and Kabst, R{\"u}diger},
  journal={Zeitschrift f{\"u}r Psychologie},
  year={2016},
  publisher={Hogrefe Publishing}
}
@article{strauss2001investigation,
  title={An investigation of personality similarity effects (relational and perceived) on peer and supervisor ratings and the role of familiarity and liking},
  author={Strauss, Judy P and Barrick, Murray R and Connerley, Mary L},
  journal={Journal of Occupational and Organizational Psychology},
  volume={74},
  number={5},
  pages={637--657},
  year={2001},
  publisher={Wiley Online Library},
  url={https://doi.org/10.1348/096317901167569}
}
@article{tajfel1982social,
  title={Social psychology of intergroup relations},
  author={Tajfel, Henri},
  journal={Annual review of psychology},
  volume={33},
  number={1},
  pages={1--39},
  year={1982},
  url={http://dx.doi.org/10.1146/annurev.ps.33.020182.000245}
}
@article{van2006evolutionary,
  title={Evolutionary origins of leadership and followership},
  author={Van Vugt, Mark},
  journal={Personality and Social Psychology Review},
  volume={10},
  number={4},
  pages={354--371},
  year={2006},
  publisher={Sage publications Sage CA: Los Angeles, CA},
  url={https://doi.org/10.1207/s15327957pspr1004_5}
}
@article{west1993power,
  title={Power, inequality, and the accomplishment of gender: An ethnomethodological view},
  author={West, Candace and Fenstermaker, Sarah and others},
  journal={Theory on gender/feminism on theory},
  pages={151--174},
  year={1993},
  publisher={Aldine De Gruyter New York}
}
@article{wiggins1985interpersonal,
  title={The interpersonal circle: A structural model for the integration of personality research},
  author={Wiggins, Jerry S and Broughton, Ross},
  journal={Perspectives in personality},
  volume={1},
  pages={1--47},
  year={1985}
}
@article{wilson1993source,
  title={Source effects in communication and persuasion research: A meta-analysis of effect size},
  author={Wilson, Elizabeth J and Sherrell, Daniel L},
  journal={Journal of the Academy of Marketing Science},
  volume={21},
  number={2},
  pages={101--112},
  year={1993},
  publisher={Springer-Verlag},
  url={https://doi.org/10.1007/BF02894421}
}
@article{wilson2016personality,
  title={Personality similarity in negotiations: Testing the dyadic effects of similarity in interpersonal traits and the use of emotional displays on negotiation outcomes.},
  author={Wilson, Kelly Schwind and DeRue, D Scott and Matta, Fadel K and Howe, Michael and Conlon, Donald E},
  journal={Journal of Applied Psychology},
  volume={101},
  number={10},
  pages={1405},
  year={2016},
  publisher={American Psychological Association}
}
