# Supplementary material
Source: publisher figshare collection journal article supplement (https://tandf.figshare.com/articles/dataset/_/11814822)

Person

Dominant

Submissive

System

Dominant

Submissive

Measures

Evaluation

Persuasion

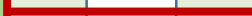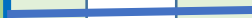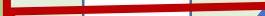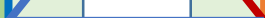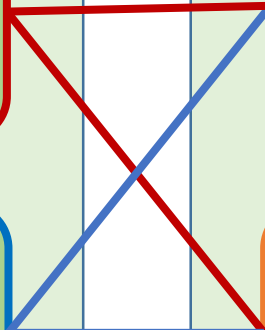

Supplement: Supplementary file 1 [file 1]

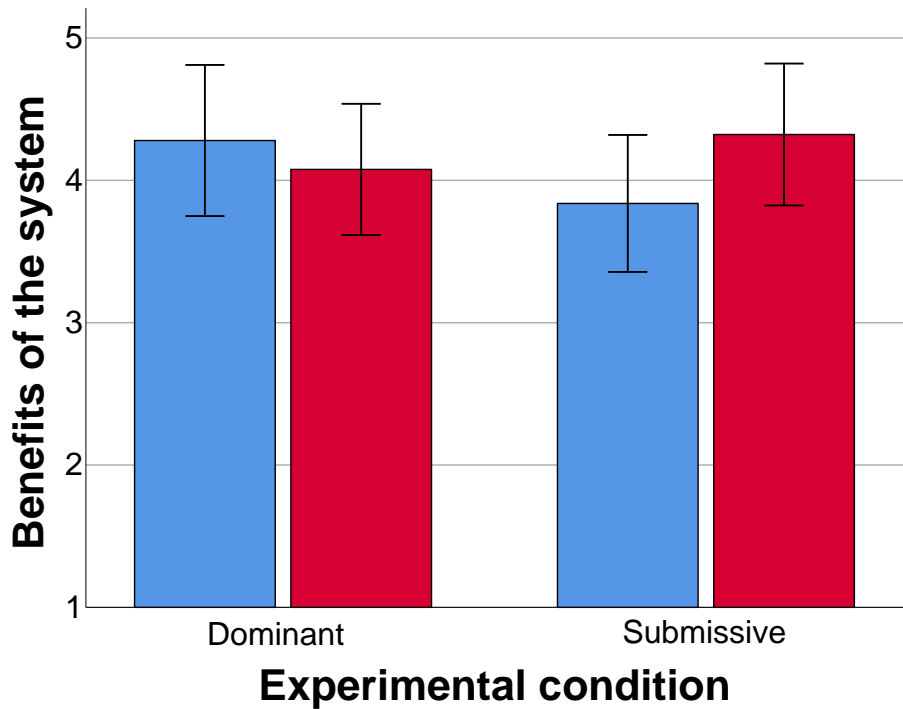

Supplement: Supplementary file 2 [file 1]

**Index of System Power Dynamic**

2.5  
2.0  
1.5  
1.0  
0.5  
0.0

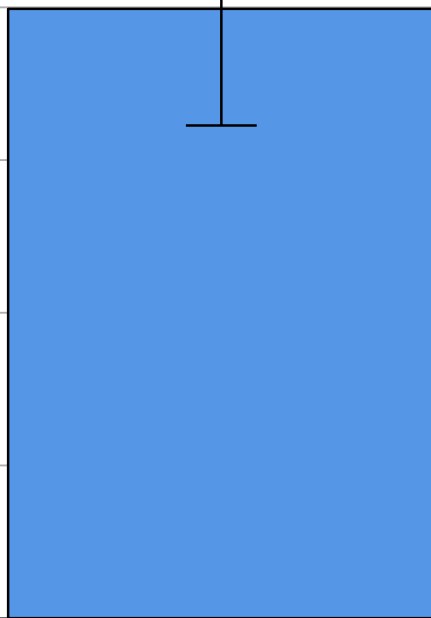

Dominant

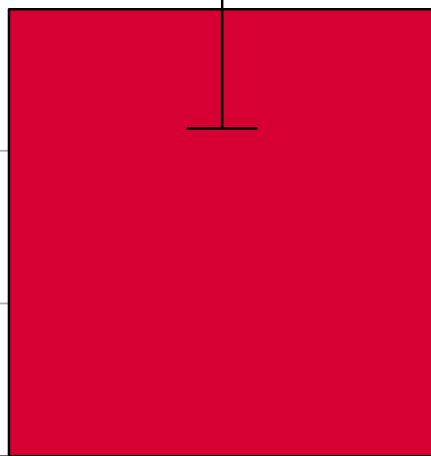

Submissive

**Experimental condition**

Supplement: Supplementary file 3 [file 1]

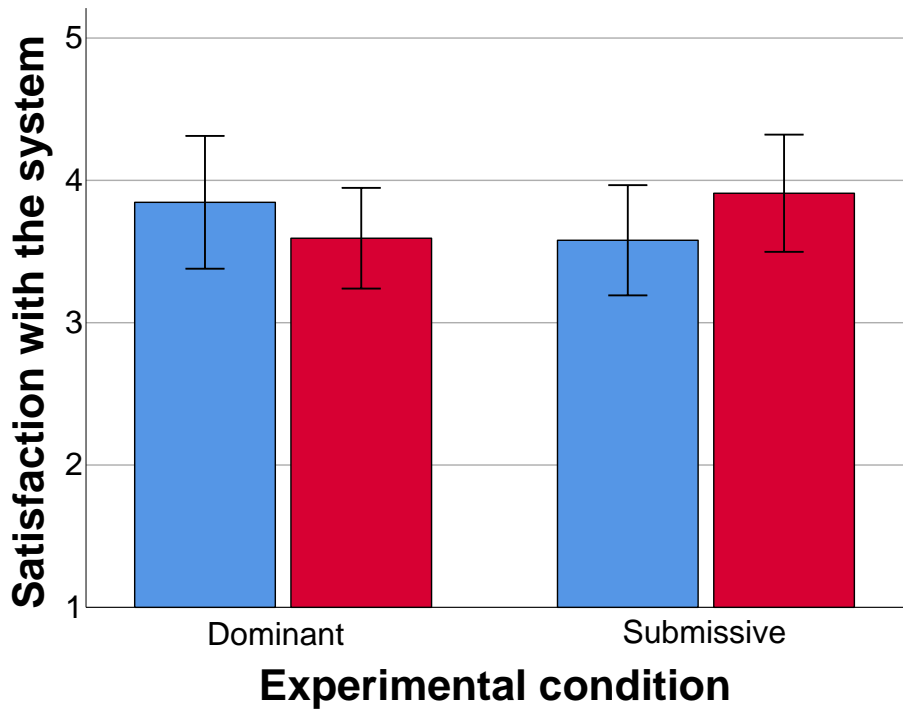

Supplement: Supplementary file 4 [file 1]

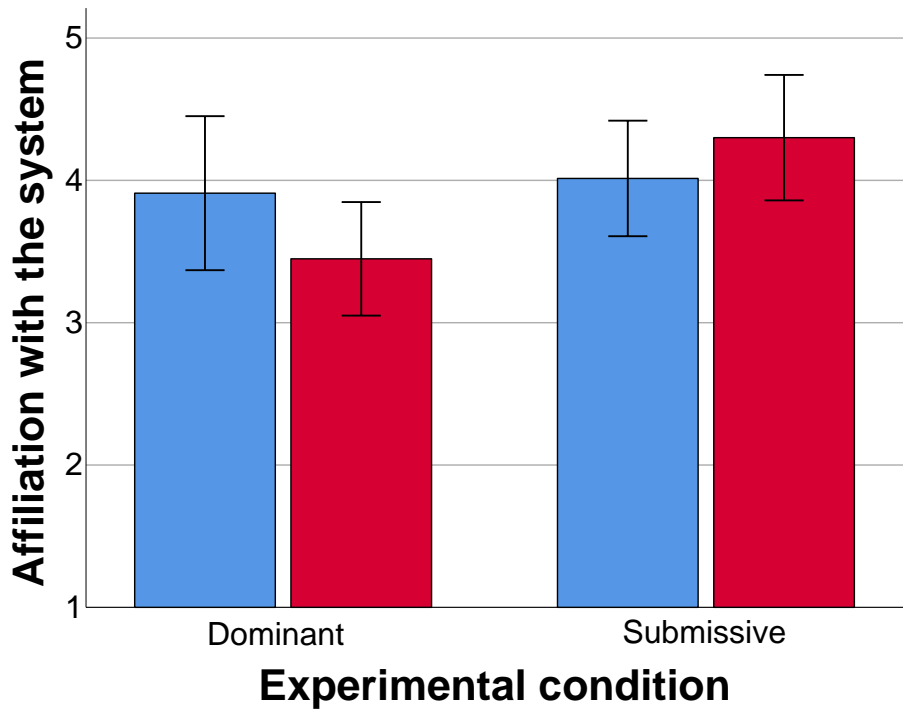

Supplement: Supplementary file 5 [file 1]

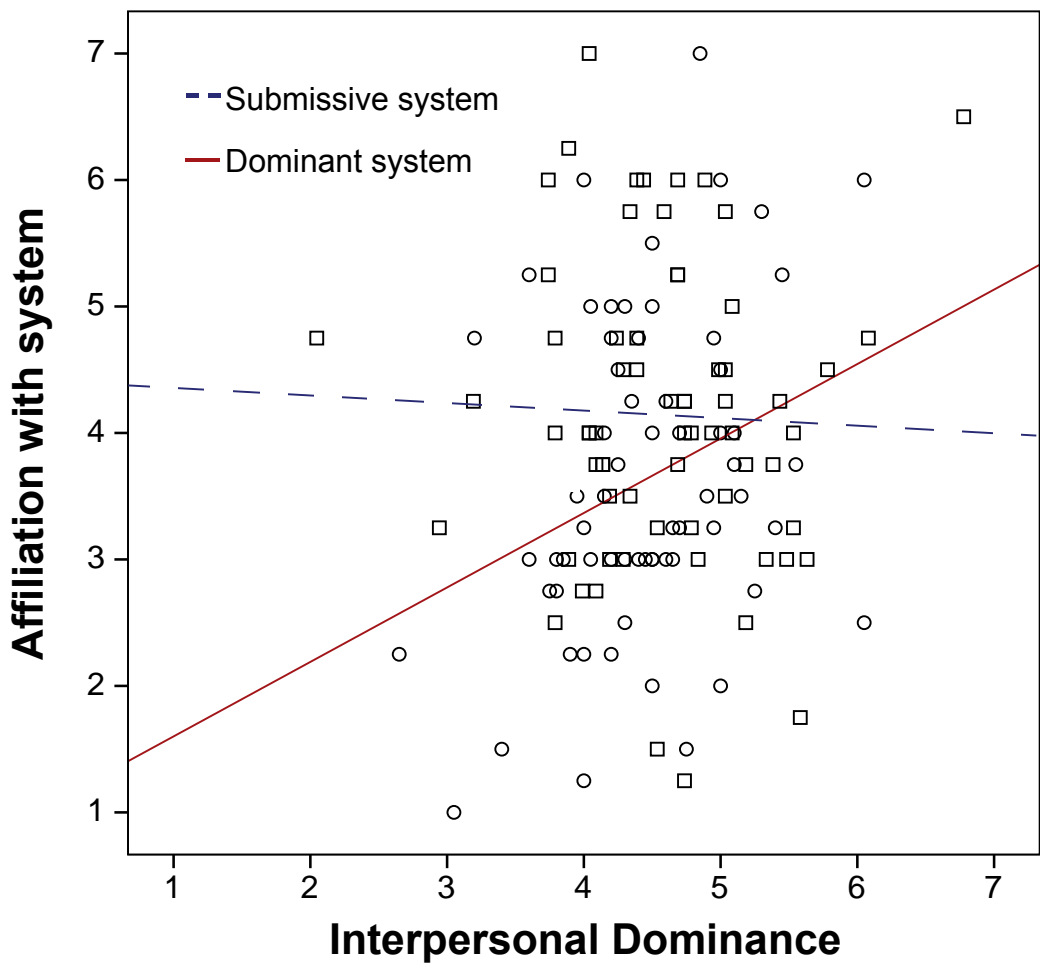

Supplement: Supplementary file 6 [file 1]

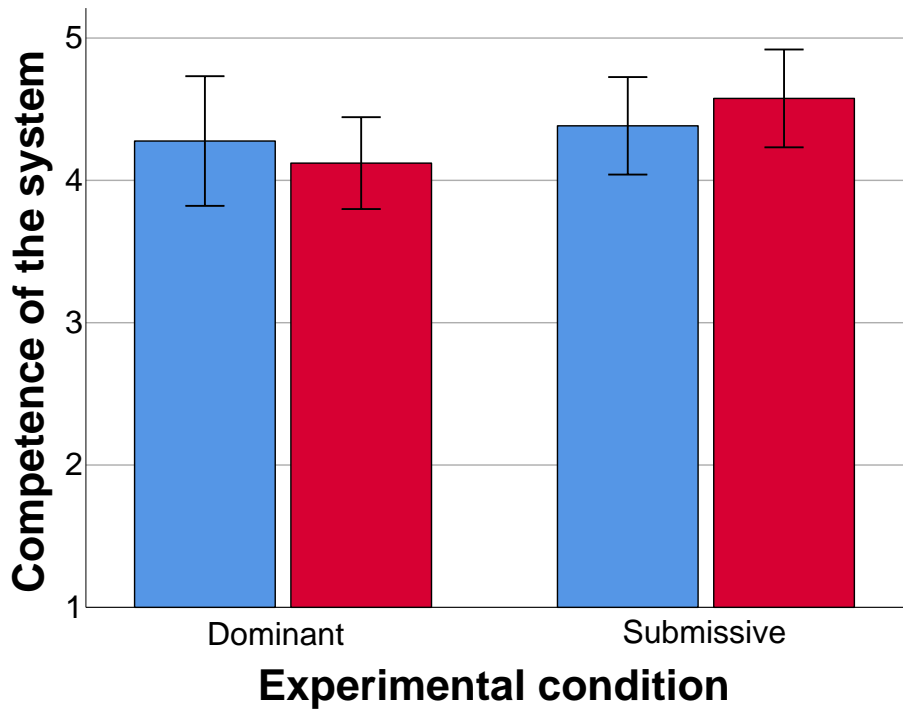

Supplement: Supplementary file 8 [file 1 › figure_competence_dominance.pdf]

**Interpersonal Dominance**

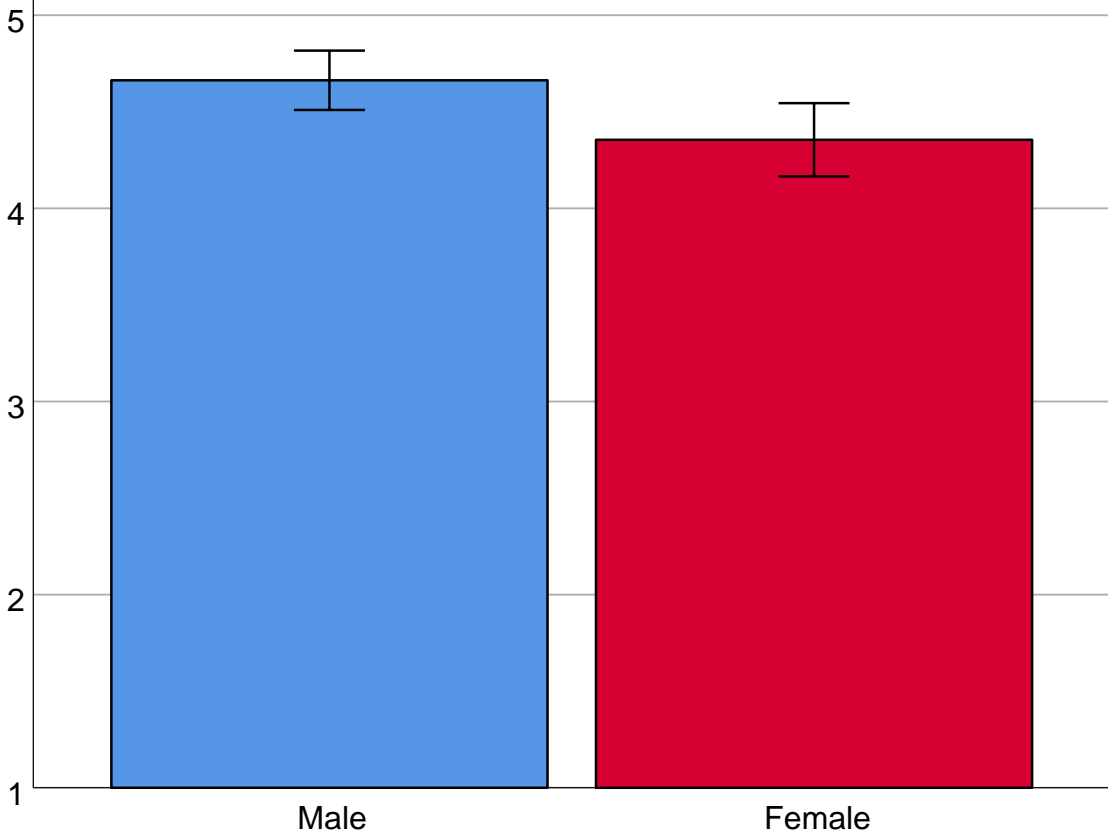

**Participant gender**

Supplement: Supplementary file 8 [file 1 › figure_person_dominance2.pdf]

**Persuasiveness**

1.00  
.80  
.60  
.40  
.20  
.00

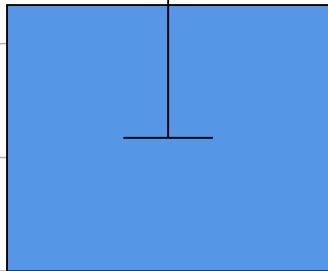

Dominant

Submissive

**Person Dominance**

Supplement: Supplementary file 8 [file 1 › figure_person_persuasion_new.pdf]

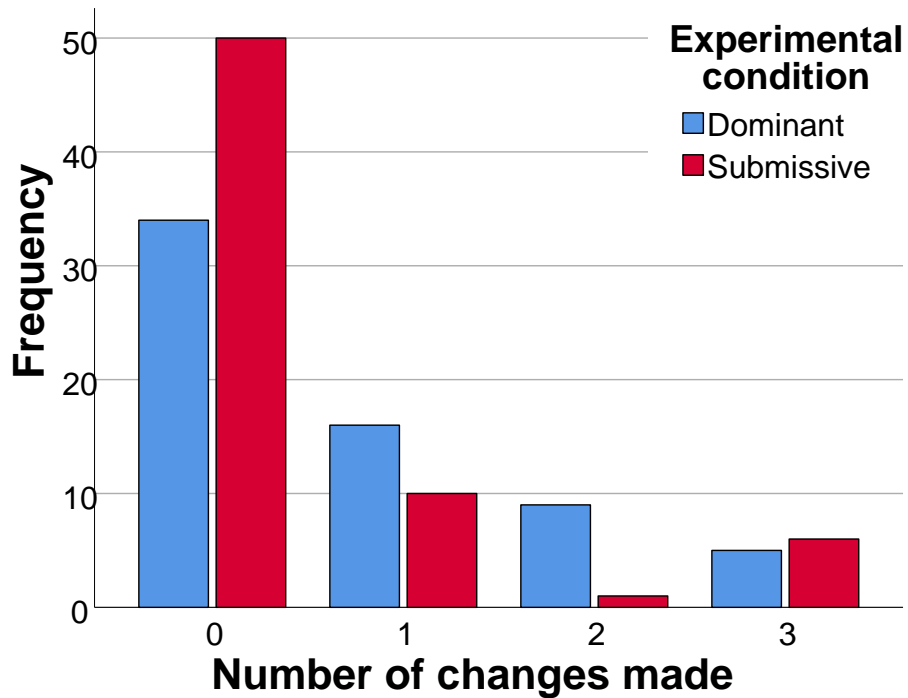

Supplement: Supplementary file 8 [file 1 › figure_persuasion_new.pdf]
